# Supplementary material
Source: publisher figshare collection journal article supplement (https://tandf.figshare.com/ndownloader/files/13596227)

GC- MS of FAMEs


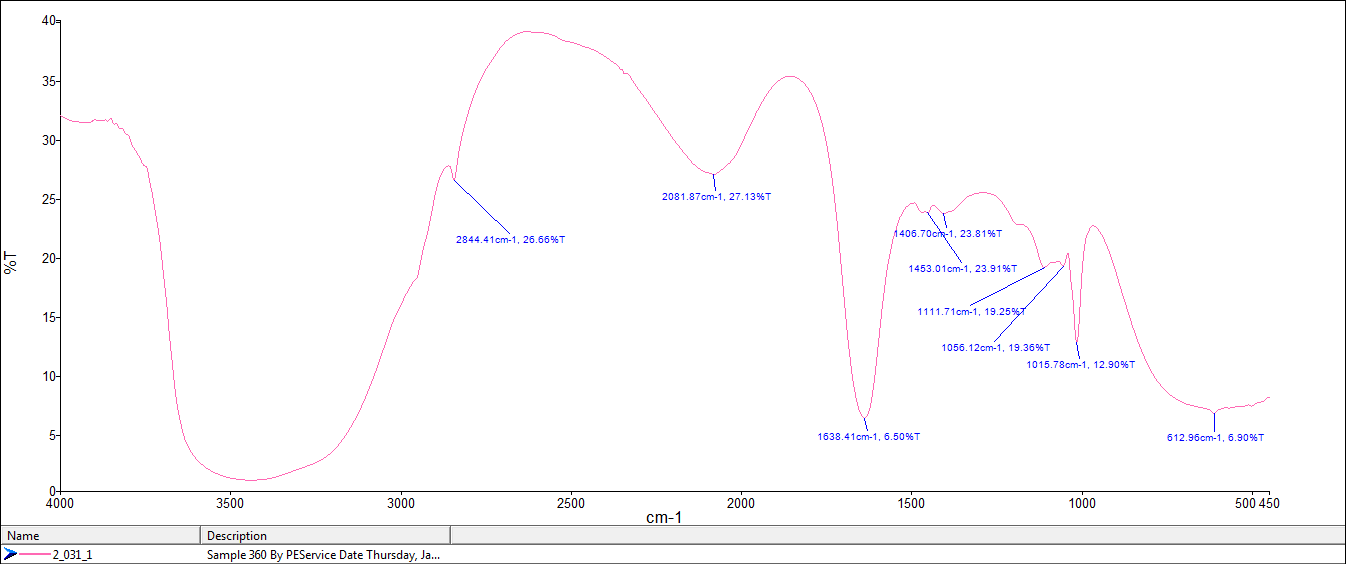


FT-IR of Pure Glycerol

Supplement: Supplementary file 1 [file 13596227]
